# Supplementary material for: Temperature Behavior of Aqueous Solutions of Poly(2-Oxazoline) Homopolymer and Block Copolymers Investigated by NMR Spectroscopy and Dynamic Light Scattering
Source: Polymers (Basel). 2020 Aug 20;12(9):1879. doi: 10.3390/polym12091879 (PMC7565327; doi:10.3390/polym12091879)
Supplement: Supplementary file 1 [file polymers-12-01879-s001.pdf]

# Temperature behavior of aqueous solutions of poly(2-oxazoline) homopolymer and block copolymers investigated by NMR spectroscopy and dynamic light scattering

Rafał Konefał<sup>1\*</sup>, Peter Černoch<sup>1</sup>, Magdalena Konefał<sup>1</sup> and Jiří Spěvák<sup>1,&\*</sup>

<sup>1</sup> Institute of Macromolecular Chemistry CAS, Heyrovského nám. 2, 162 06 Prague 6, Czech Republic;  
[konefal@imc.cas.cz](mailto:konefal@imc.cas.cz) (R.K.), [cernoch@imc.cas.cz](mailto:cernoch@imc.cas.cz) (P.Č.), [magdalenakonefal@imc.cas.cz](mailto:magdalenakonefal@imc.cas.cz) (M.K.),  
[spevacek@imc.cas.cz](mailto:spevacek@imc.cas.cz) (J.S.),

\* Correspondence: [konefal@imc.cas.cz](mailto:konefal@imc.cas.cz) (R.K.), [spevacek@imc.cas.cz](mailto:spevacek@imc.cas.cz) (J.S.)  
 & Professor Emeritus (J.S.)

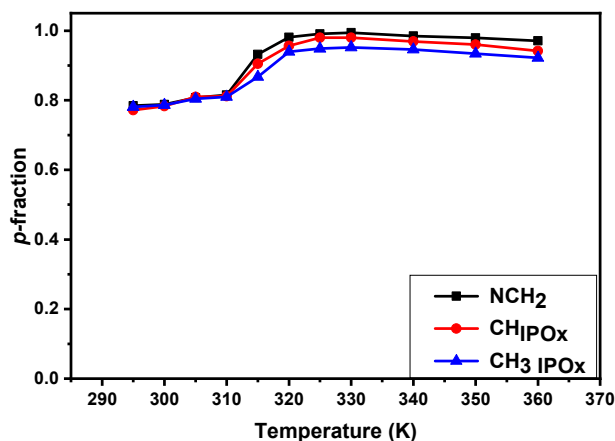

**Figure S1.** Temperature dependences of the fraction  $p$  as determined for all signals of various proton types in D<sub>2</sub>O solution ( $c = 5$  wt%) of PIPOx homopolymer during gradual cooling.

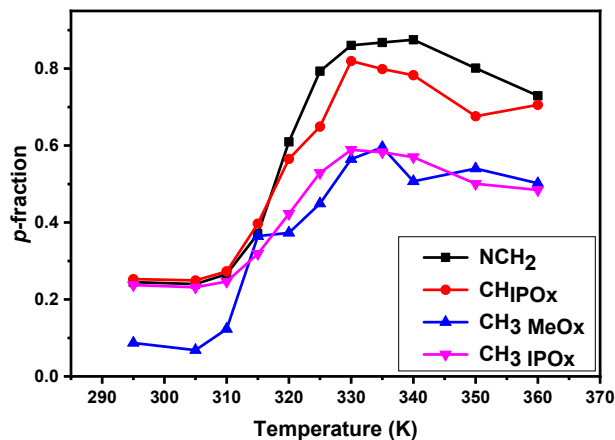

**Figure S2.** Temperature dependences of the fraction  $p$  as determined for all signals of various proton types in D<sub>2</sub>O solution ( $c = 5$  wt%) of P(MeOx/IPOx)(14/86) copolymer during gradual cooling.

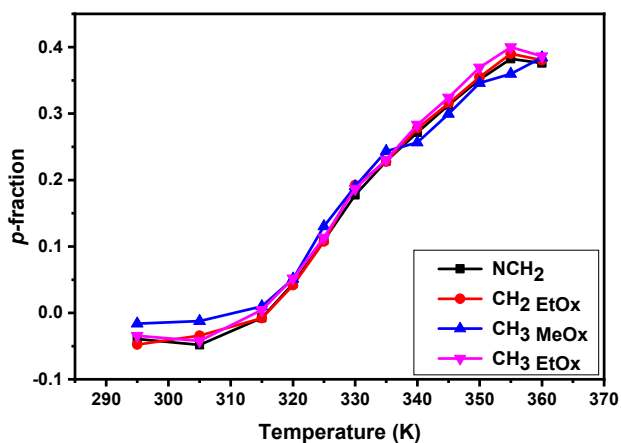

**Figure S3.** Temperature dependences of the fraction  $p$  as determined for all signals of various proton types in D<sub>2</sub>O solution ( $c = 5$  wt%) of P(MeOx/EtOx)(28/72) copolymer during gradual cooling.

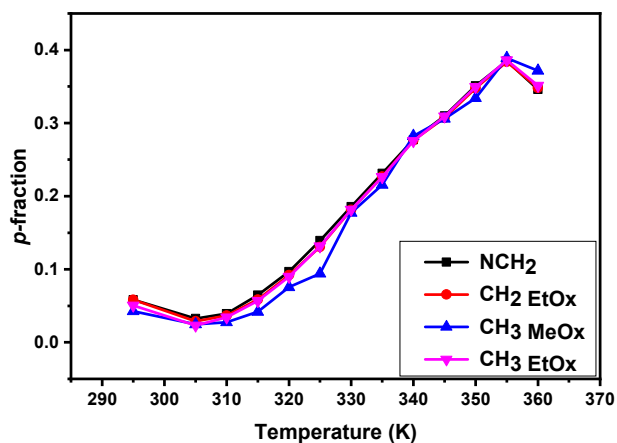

**Figure S4.** Temperature dependences of the fraction  $p$  as determined for all signals of various proton types in D<sub>2</sub>O solution ( $c = 5$  wt%) of P(MeOx/EtOx)(7/93) copolymer during gradual cooling.

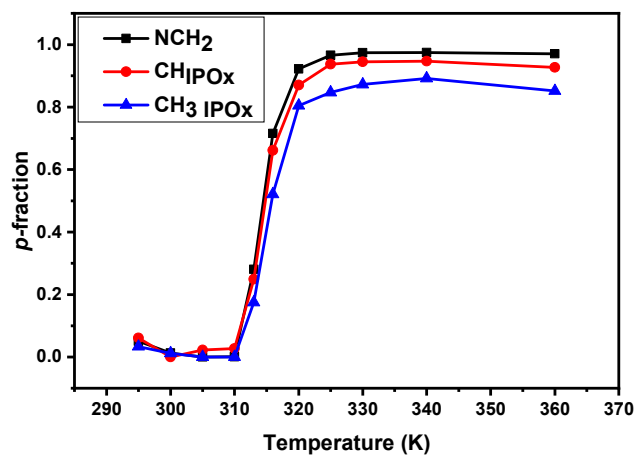

**Figure S5.** Temperature dependences of the fraction  $p$  as determined for all signals of various proton types in D<sub>2</sub>O solution ( $c = 0.5$  wt%) of PIPOx homopolymer during gradual heating.

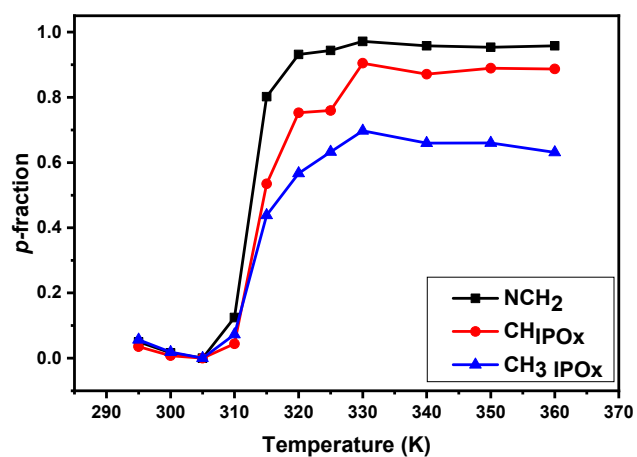

**Figure S6.** Temperature dependences of the fraction  $p$  as determined for all signals of various proton types in D<sub>2</sub>O solution ( $c = 20$  wt%) of PIPOx homopolymer during gradual heating.

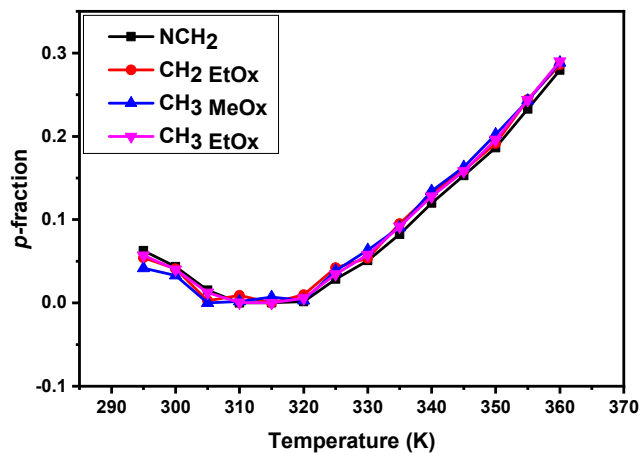

**Figure S7.** Temperature dependences of the fraction  $p$  as determined for all signals of various proton types in D<sub>2</sub>O solution ( $c = 0.5$  wt%) of P(MeOx/EtOx)(28/72) copolymer during gradual heating.

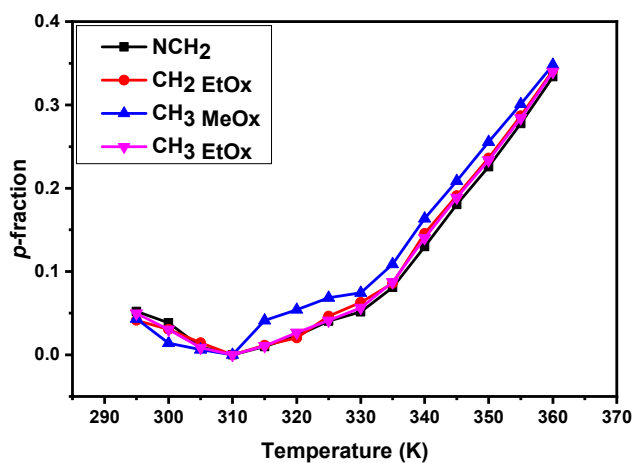

**Figure S8.** Temperature dependences of the fraction  $p$  as determined for all signals of various proton types in D<sub>2</sub>O solution ( $c = 20$  wt%) of the P(MeOx/EtOx)(28/72) copolymer during gradual heating.

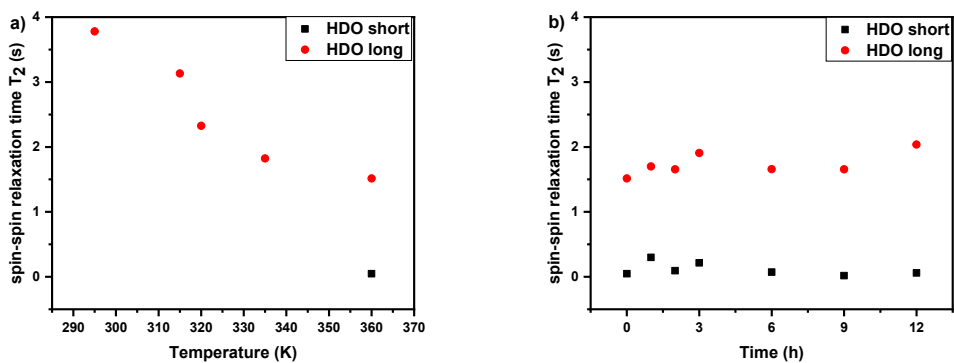

**Figure S9.** Temperature dependence (a) and time dependence at 360 K (b) of  $^1H$  spin-spin relaxation times  $T_2$  of HDO in  $D_2O$  solution ( $c = 5$  wt%) of the P(MeOx/IPOx)(14/86) copolymer.

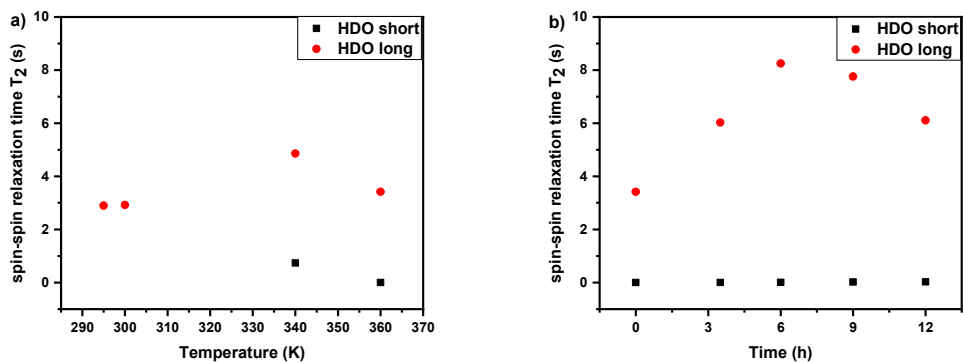

**Figure S10.** Temperature dependence (a) and time dependence at 360 K (b) of  $^1H$  spin-spin relaxation times  $T_2$  of HDO in  $D_2O$  solution ( $c = 5$  wt%) of the P(MeOx/EtOx)(28/72) copolymer.

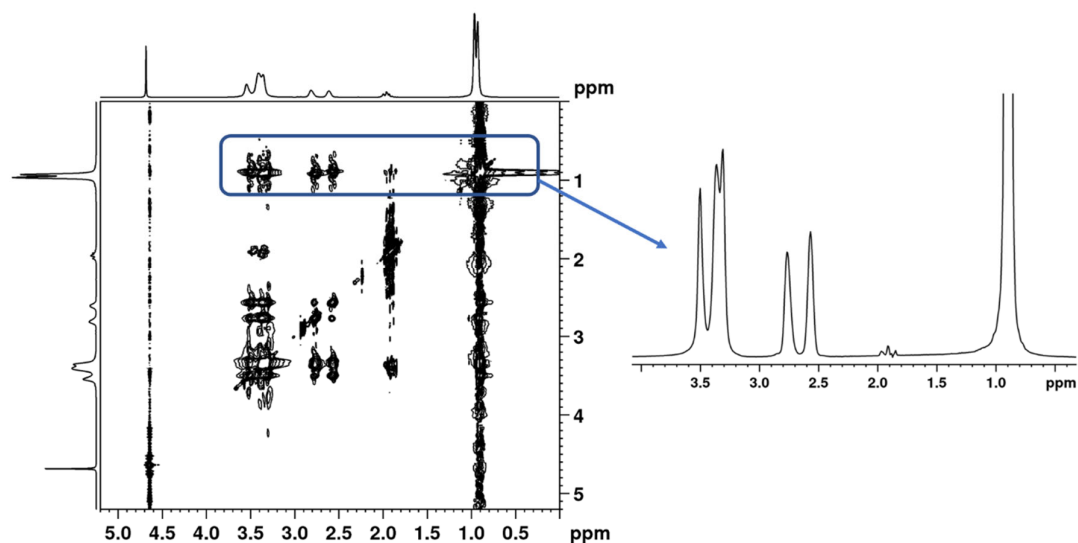

**Figure S11.** 2D NOESY spectrum of the P(MeOx/IPOx)(14/86) block copolymer in D<sub>2</sub>O solution ( $c = 5$  wt%) measured at 295 K with mixing time 600 ms. On the right there is 1D slice spectrum extracted from the signal at 1.05 ppm of CH<sub>3</sub> protons of PIPOx units of the NOESY spectrum.

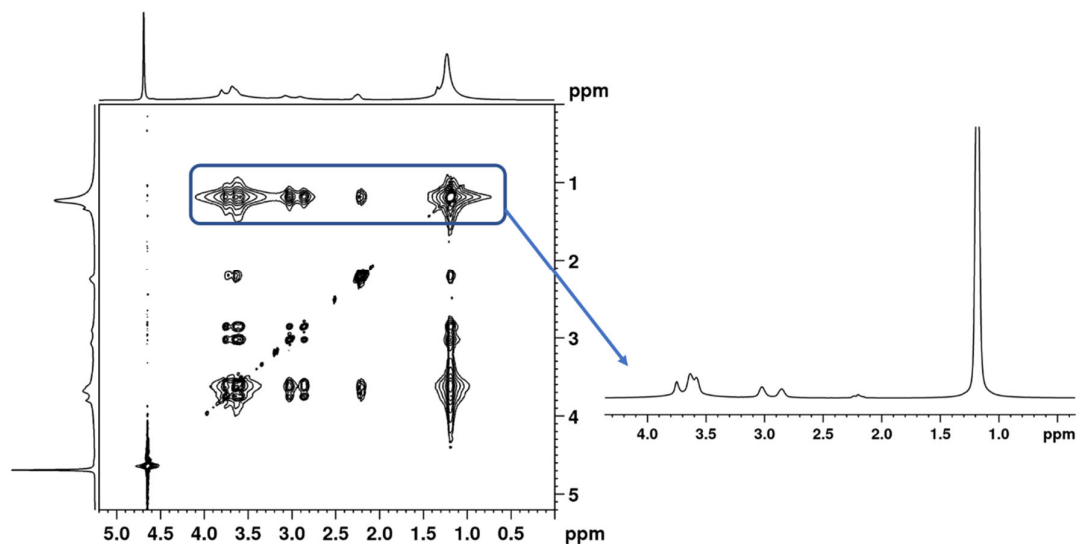

**Figure S12.** 2D NOESY spectrum of the P(MeOx/IPOx)(14/86) block copolymer in D<sub>2</sub>O solution ( $c = 5$  wt%) measured at 320 K with mixing time 600 ms. On the right there is 1D slice spectrum extracted from the signal at 1.05 ppm of CH<sub>3</sub> protons of PIPOx units of the NOESY spectrum.

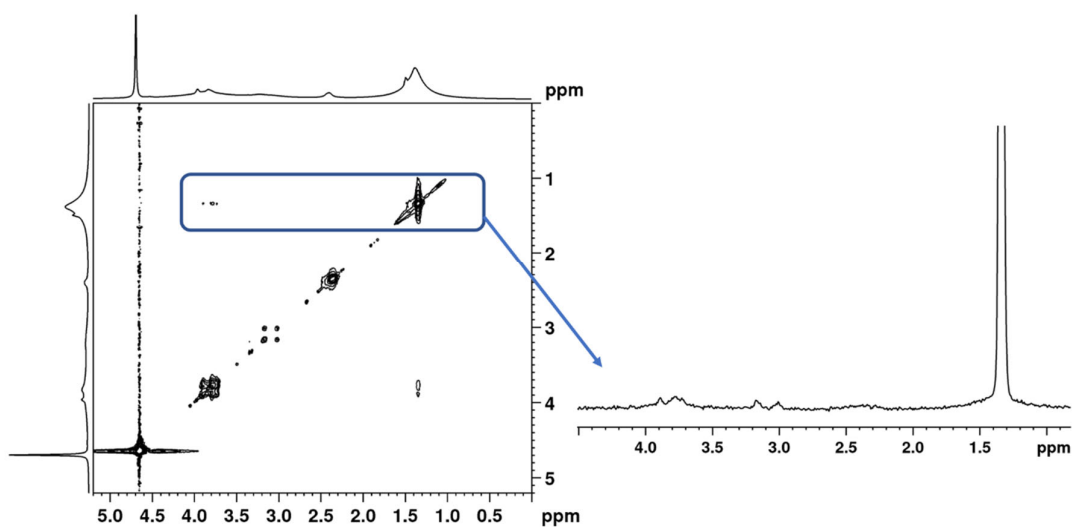

**Figure S13.** 2D NOESY spectrum of the P(MeOx/IPOx)(14/86) block copolymer in D<sub>2</sub>O solution ( $c = 5$  wt%) measured at 335 K with mixing time 600 ms. On the right there is 1D slice spectrum extracted from the signal at 1.05 ppm of CH<sub>3</sub> protons of PIPOx units of the NOESY spectrum.

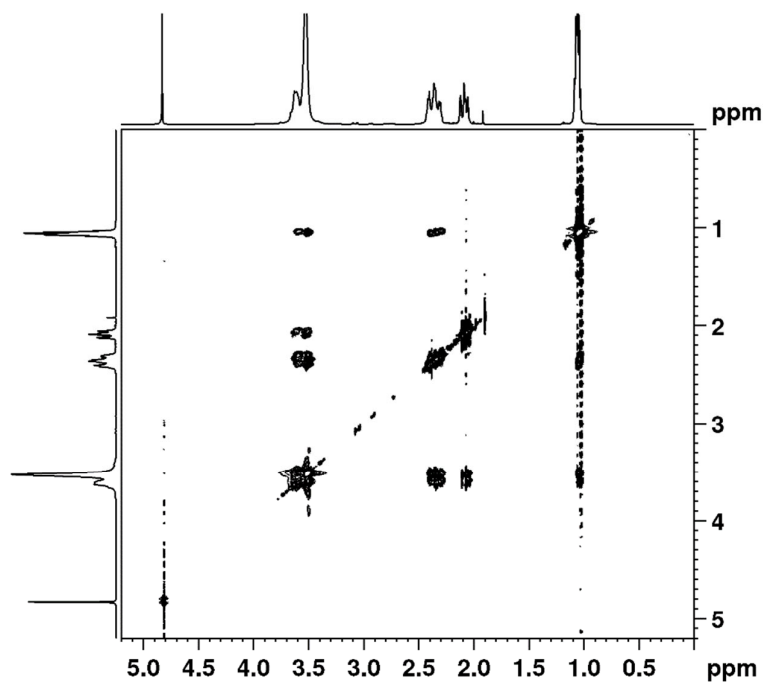

**Figure S14.** 2D NOESY spectrum of the P(MeOx/EtOx)(28/72) block copolymer in D<sub>2</sub>O solution ( $c = 5$  wt%) measured at 295 K with mixing time 600 ms.

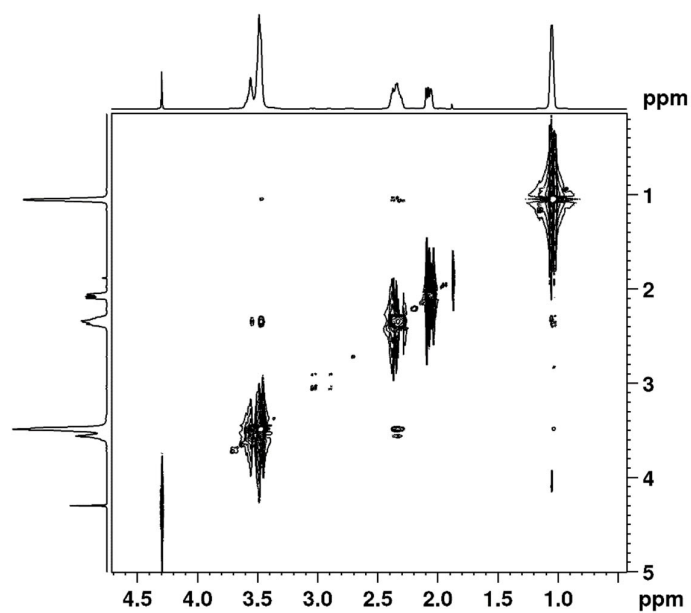

**Figure S15.** 2D NOESY spectrum of the P(MeOx/EtOx)(28/72) block copolymer in D<sub>2</sub>O solution (c = 5 wt%) measured at 340 K with mixing time 600 ms.

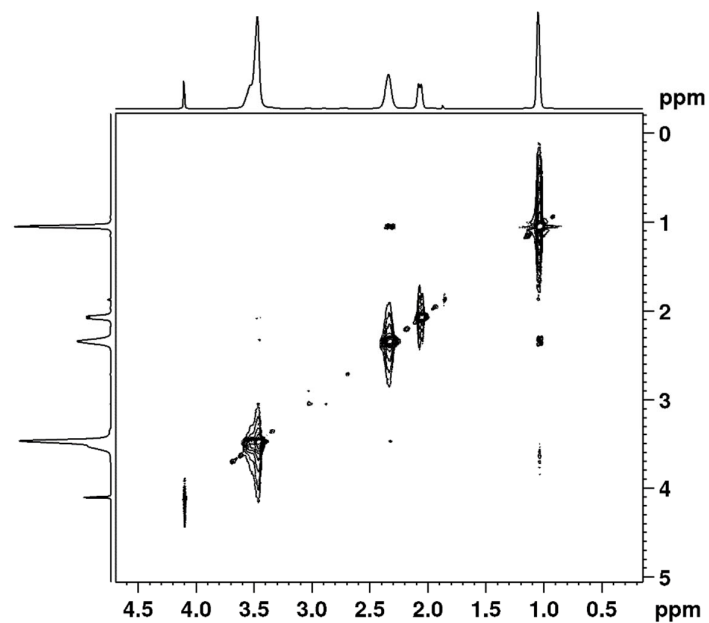

**Figure S16.** 2D NOESY spectrum of the P(MeOx/EtOx)(28/72) block copolymer in D<sub>2</sub>O solution (c = 5 wt%) measured at 360 K with mixing time 600 ms.
